# Supplementary material
Source: PubMed Central journal article supplement (PMC9741081)
Supplement: NIHMS1844395-supplement-ESI.pdf [file NIHMS1844395-supplement-ESI.pdf]

## SUPPLEMENTAL MATERIALS

**Title :** Inflammatory serum factors from aortic valve stenosis patients modulate sex differences in valvular myofibroblast activation and osteoblast-like differentiation

**Authors:** Brandon J. Vogt<sup>1,2,3</sup>, Douglas K. Peters<sup>4</sup>, Kristi S. Anseth<sup>3,4</sup>, Brian A. Aguado<sup>1,2\*</sup>

### **Affiliations:**

<sup>1</sup> Department of Bioengineering, University of California San Diego, La Jolla, CA 92093, USA

<sup>2</sup> Sanford Consortium for Regenerative Medicine, La Jolla, CA 92037, USA

<sup>3</sup> Department of Chemical and Biological Engineering, University of Colorado Boulder, CO 80303, USA

<sup>4</sup> BioFrontiers Institute, University of Colorado Boulder, CO 80309, USA

### **\*Address correspondence to:**

Brian A. Aguado, Ph.D.

2880 Torrey Pines Scenic Drive

University of California San Diego

Sanford Consortium for Regenerative Medicine

La Jolla, CA 92037

Email: [baguado@eng.ucsd.edu](mailto:baguado@eng.ucsd.edu)

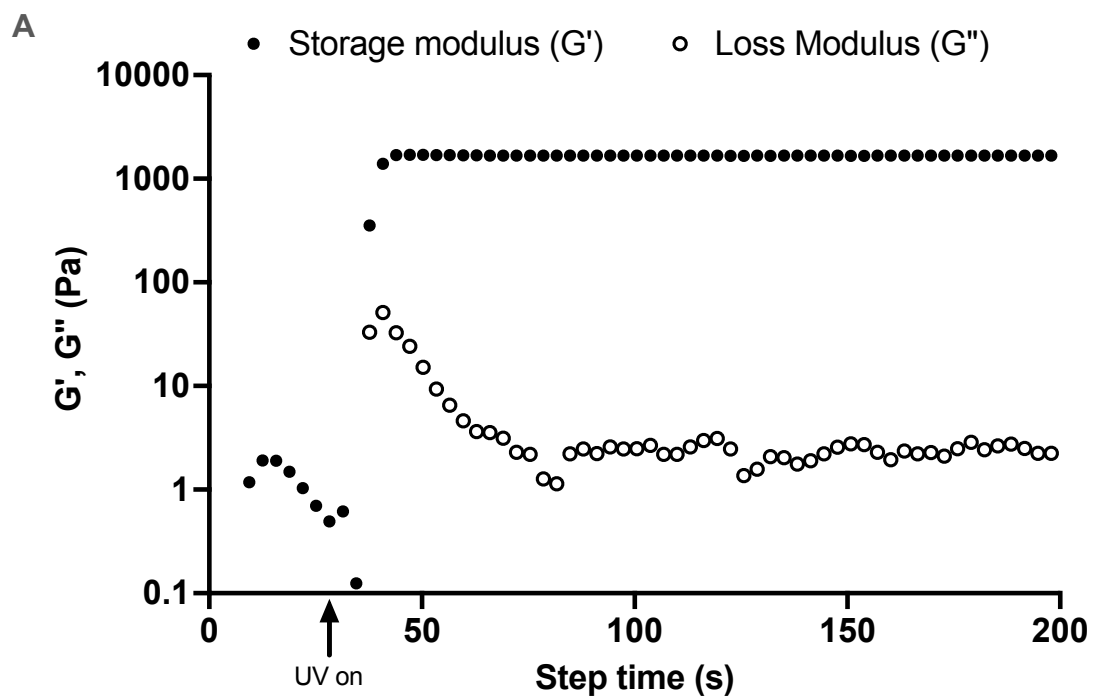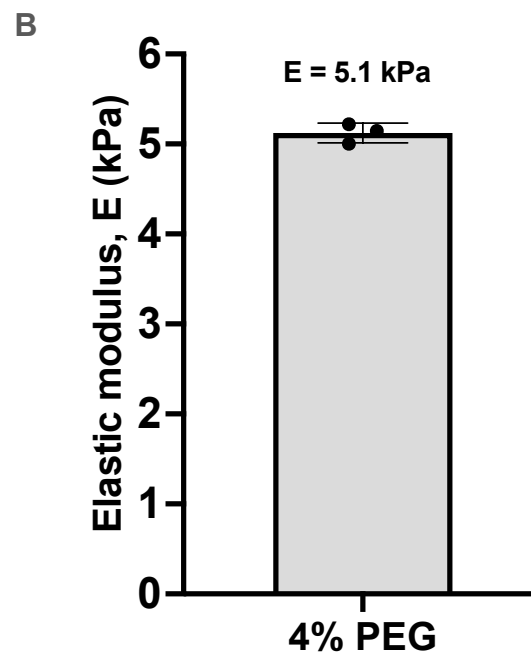

**Supplemental Figure 1.** *Rheological measurements of PEG hydrogels.* (A) Storage and loss moduli of hydrogel precursor solution upon exposure to UV light. N=1 representative measurement shown. (B) Elastic modulus of 4% PEG formulation used to form hydrogels. N=3 measurements, mean  $\pm$  standard deviation shown.

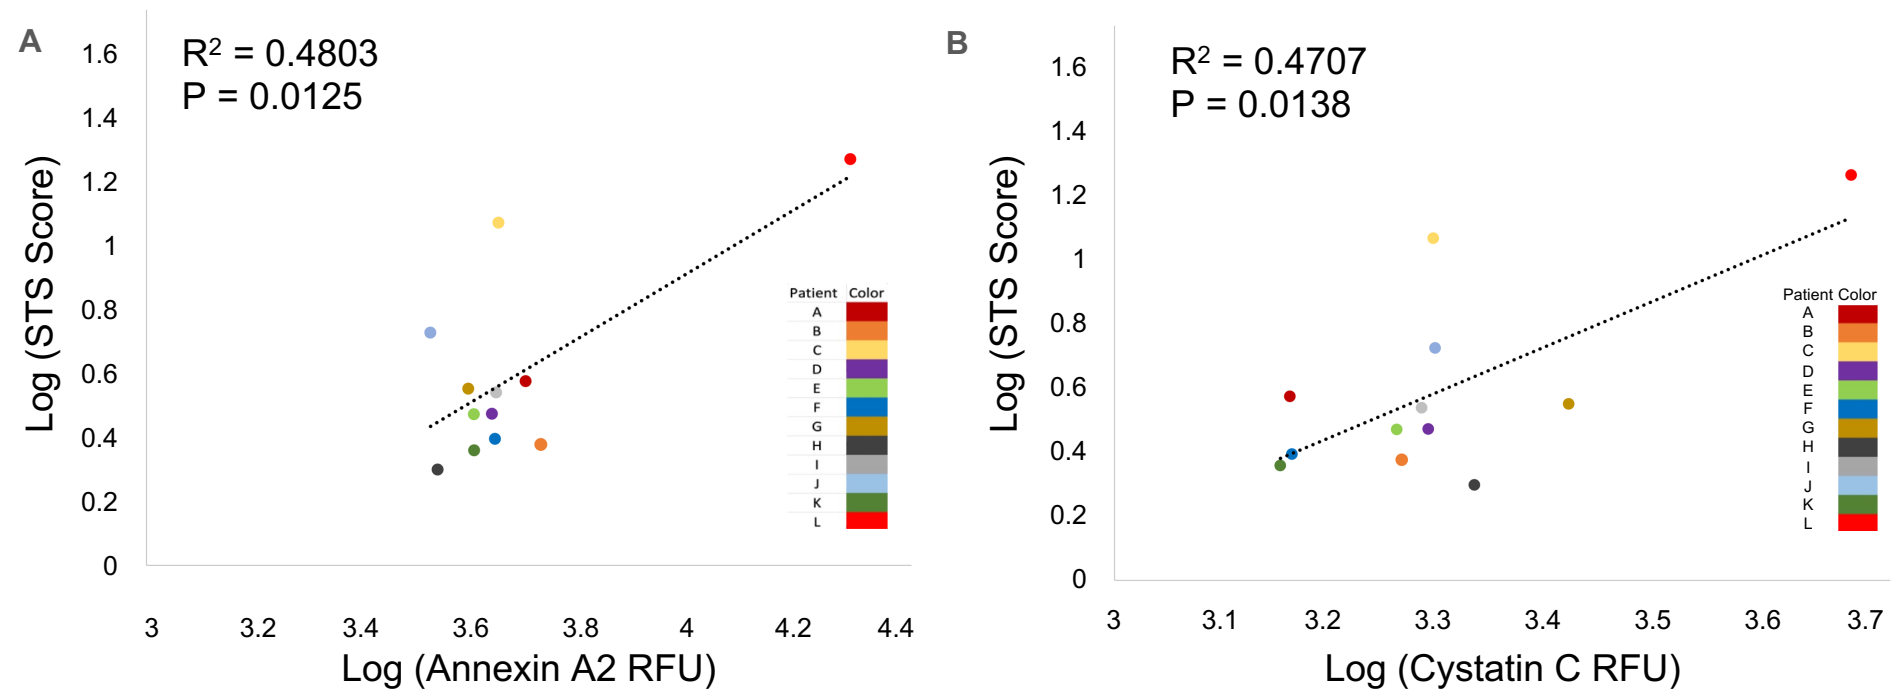

**Supplemental Figure 2.** *Linear regression analysis on the logarithmic transformation of STS score and protein abundance eliminates strong outliers and confirms significant correlations. (A-B)* Correlation plots comparing patient STS score and (A) annexin A2 abundance or (B) cystatin C abundance. Strong outliers were defined as  $Q1 - 3 \cdot IQR$  and  $Q3 + 3 \cdot IQR$  based on  $\log(\text{STS score})$ .  $Q1$  = quartile 1,  $Q3$  = quartile 3, and  $IQR$  = interquartile range.

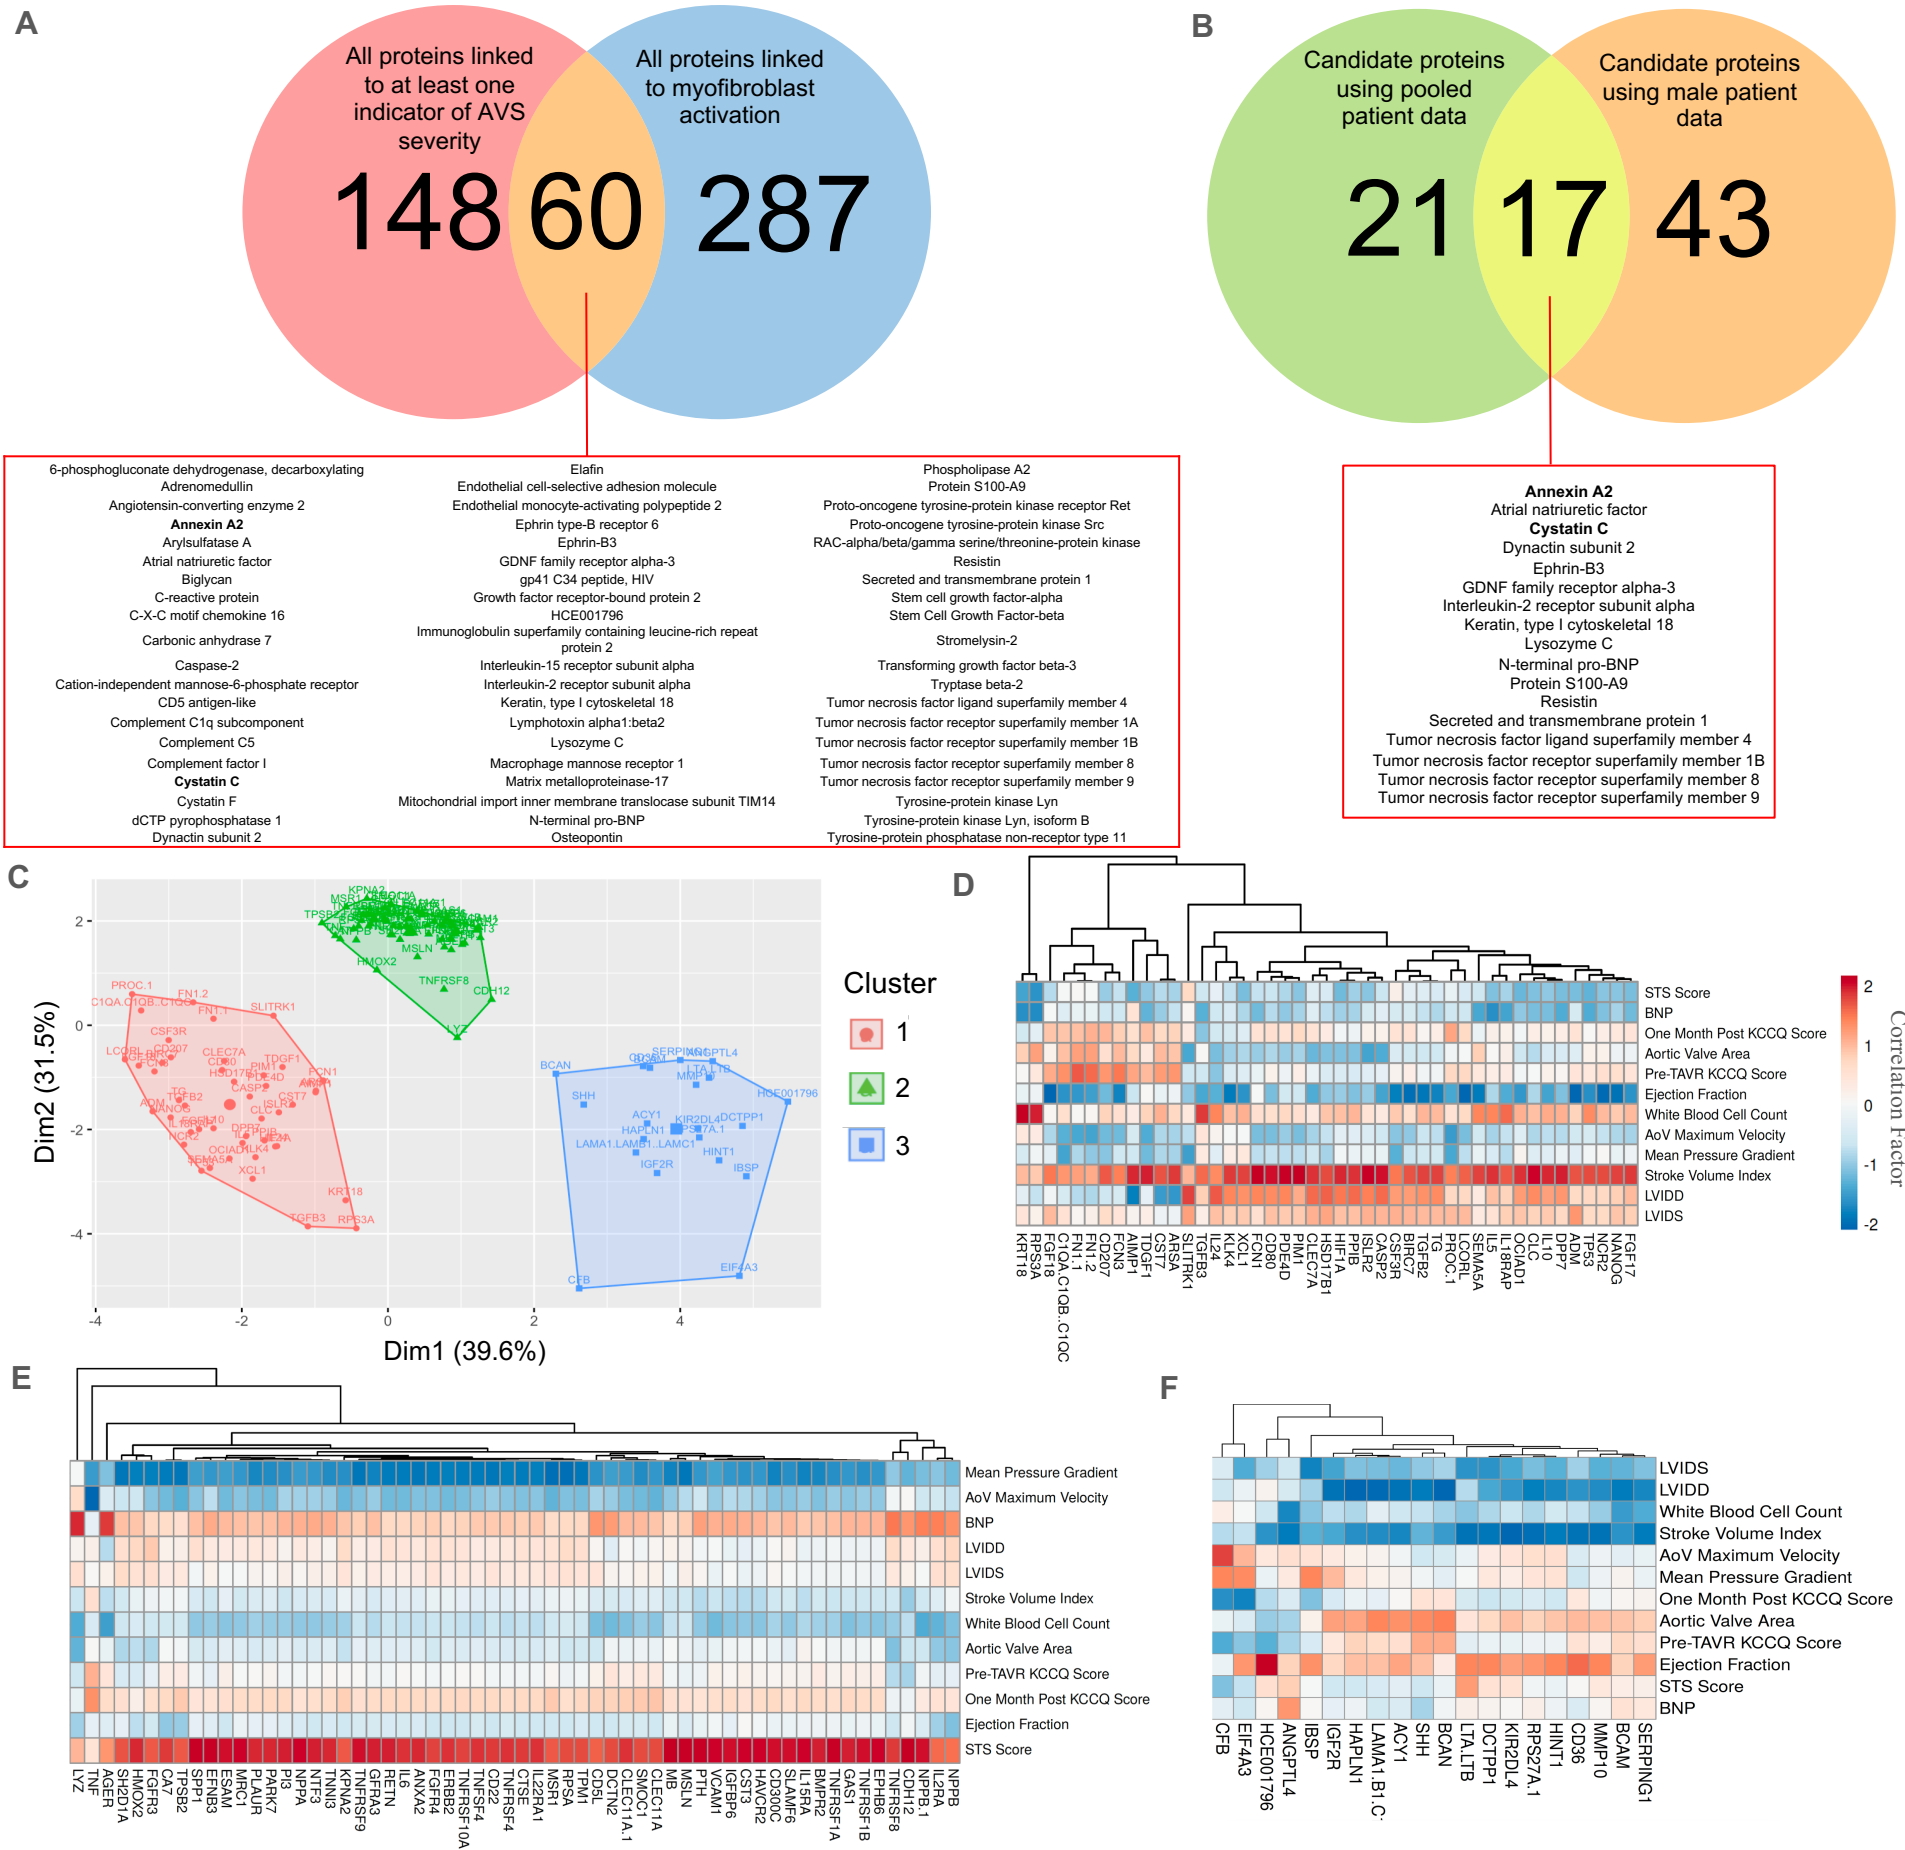

**Supplemental Figure 3. Correlation analysis determines clinically relevant candidate proteins in male patient serum samples** (A) Venn diagram showing the overlap between proteins significantly correlated ( $R > 0.9$ ) with at least one measure of AVS severity and proteins significantly correlated ( $R > 0.75$ ) with myofibroblast activation *in vitro*. (B) Venn diagram showing the overlap between candidate proteins from pooled patient data and male patient data. (C) K-means cluster plot grouping serum proteins significantly correlated ( $R > 0.9$ ) with at least one clinical measure of AVS severity into three clusters. (D-F) Correlation matrices showing (D) cluster 1, (E) cluster 2, and (F) cluster 3 proteins that significantly correlate ( $R > 0.9$ ) with at least one measure of AVS severity.

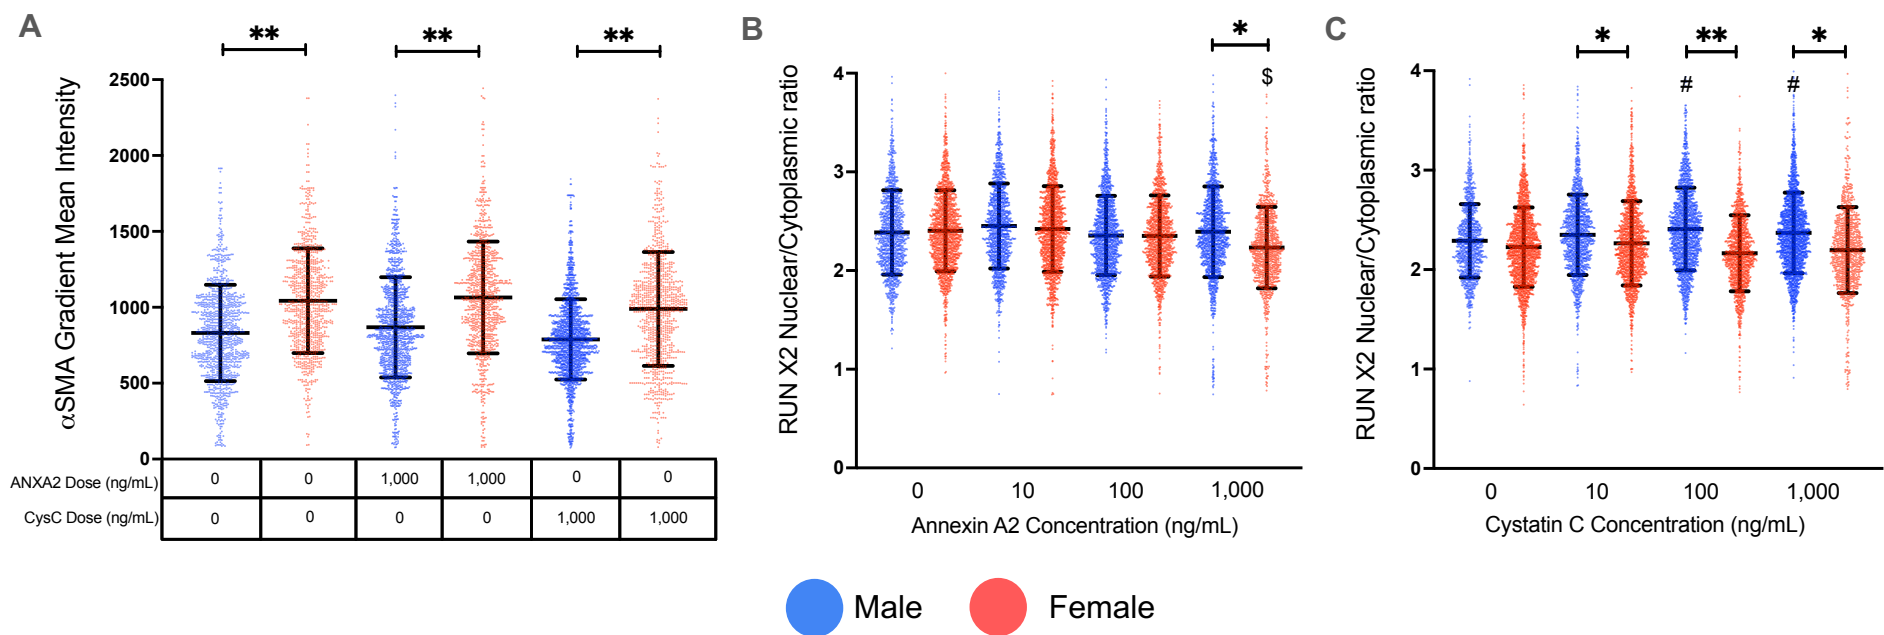

**Supplemental Figure 4.** VICs cultured on TCPS show minimal changes in myofibroblast activation and osteoblast-like differentiation (A)  $\alpha$ -SMA gradient mean intensity data of VICs treated with either annexin A2 or cystatin C on TCPS. (B-C) RUN X2 nuclear localization data of VICs treated with (B) annexin A2 or (C) cystatin C on TCPS. For all graphs, data is shown as mean  $\pm$  standard deviation with statistical significance determined by one-way ANOVA with Tukey posttests ( $p < 0.0001$ ) and effect size between statistically significant groups measured by the Cohen's d-value indicated by  $** = d > 0.5$ ,  $* = d > 0.2$  for sex differences;  $\# = d > 0.2$  for differences from the male control group;  $\$ = d > 0.2$  for differences from the female control group.

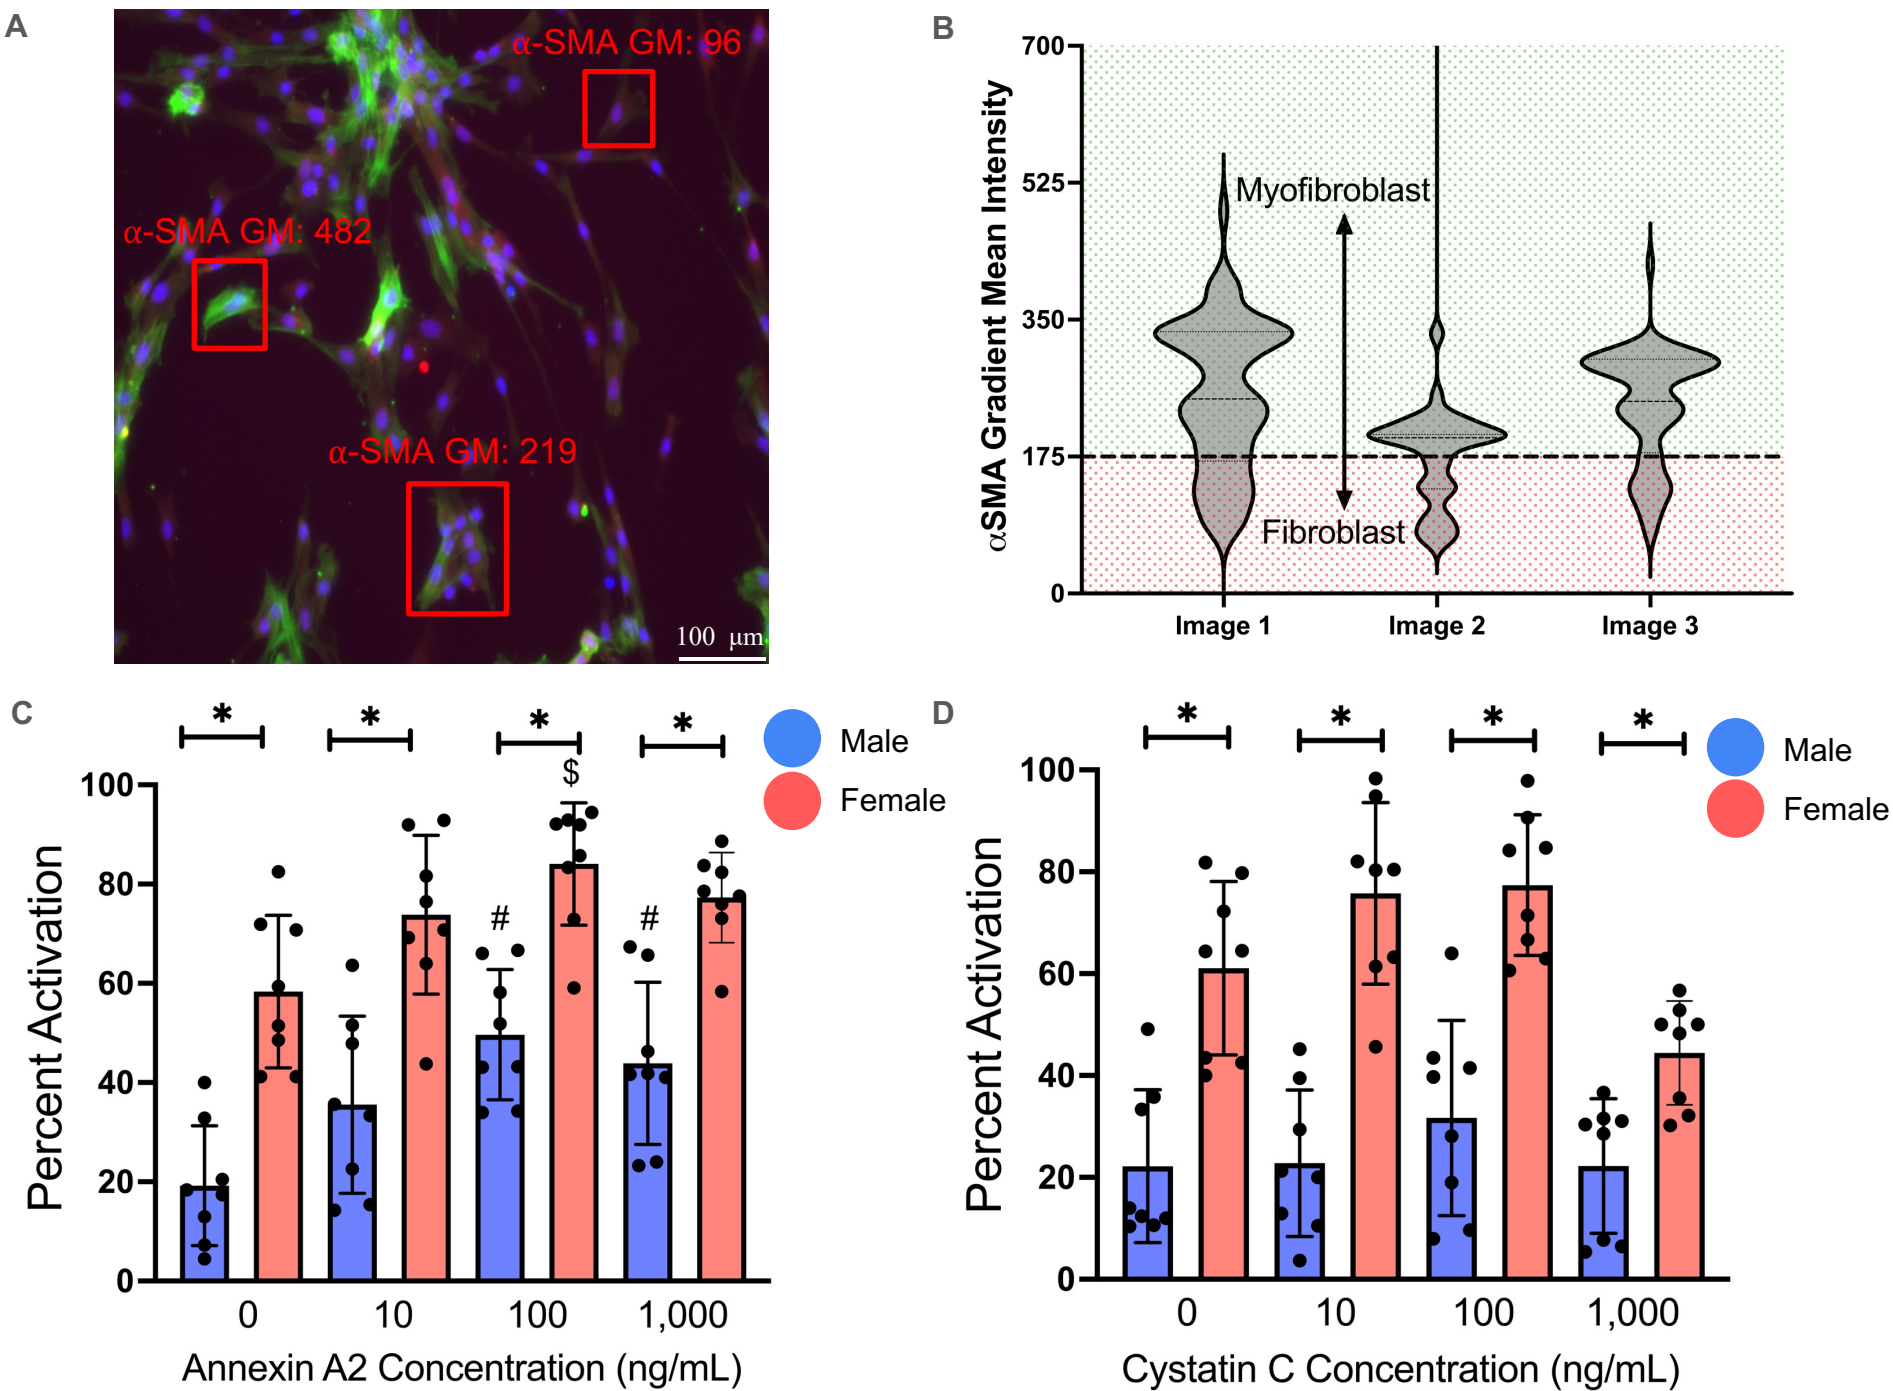

**Supplemental Figure 5.** Quantifying the percentage of VICs activating to myofibroblasts using thresholds for  $\alpha$ -SMA gradient mean intensity confirms annexin A2 and cystatin C increase VIC myofibroblast activation. **(A)** Representative image showing  $\alpha$ -SMA gradient mean (GM) values for individual cell groups. **(B)** Violin plots of three representative images to determine  $\alpha$ -SMA GM threshold. **(C)** Bar graph showing percent activation of VICs treated with annexin A2 and cultured on hydrogels. **(D)** Bar graph showing percent activation of VICs treated with cystatin C and cultured on hydrogels. For immunofluorescent stains: green =  $\alpha$ -SMA; red = RUNX2; blue = DAPI. For all graphs, data is shown as mean  $\pm$  standard deviation with statistical significance determined by one-way ANOVA with Tukey posttests. Statistical significance ( $p < 0.05$ ) is indicated by \* for sex differences; # for differences relative to the male control group; \$ for differences relative to the female control group.

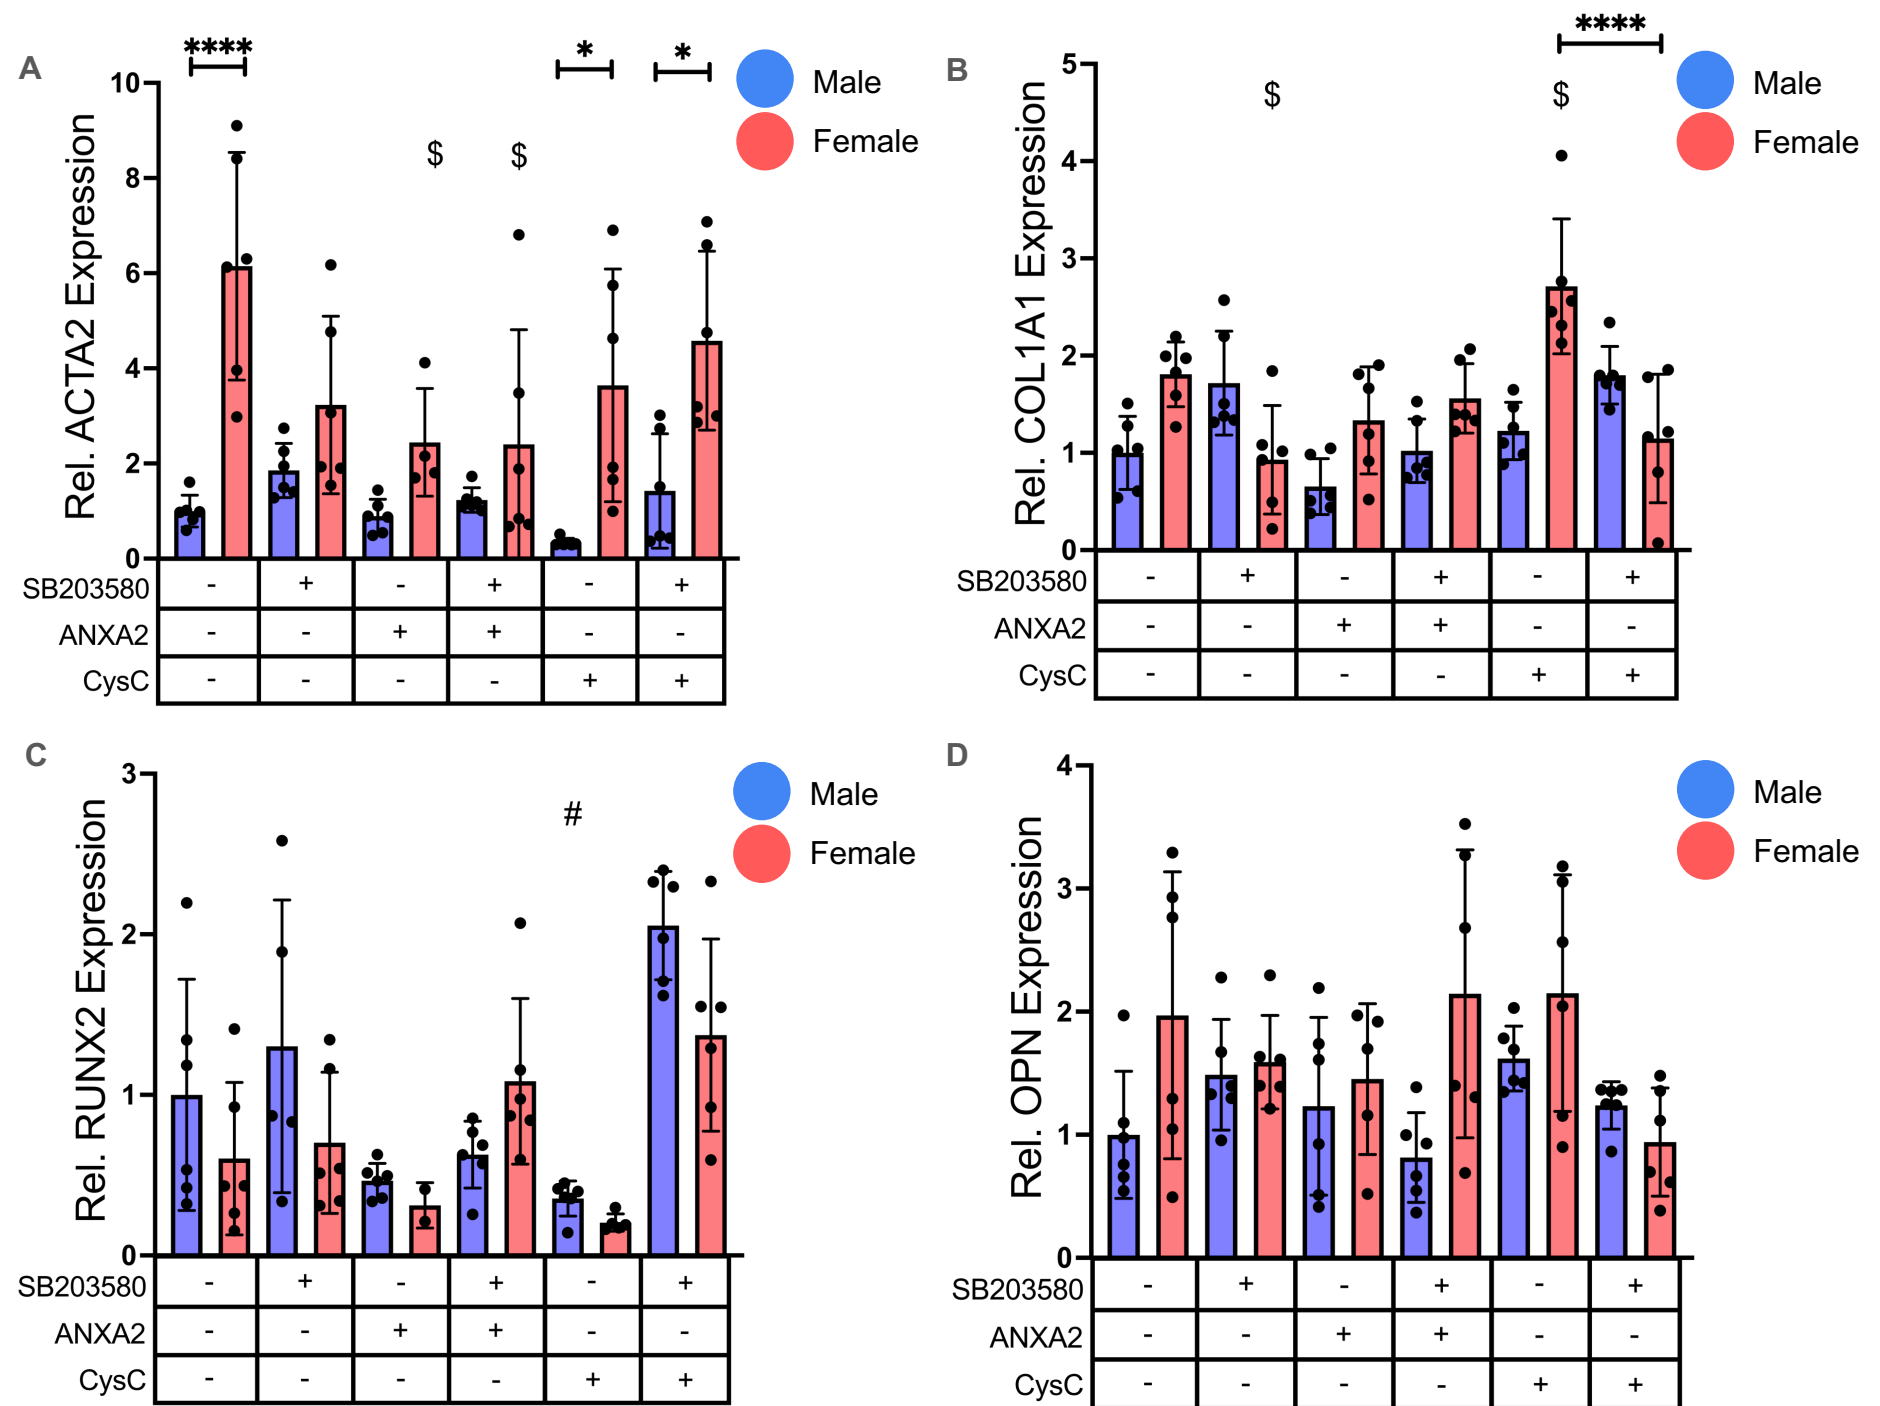

**Supplemental Figure 6.** *Quantitative ACTA2, COL1A1, RUNX2, and OPN gene expression using RT-PCR.* (A) *ACTA2*, (B) *COL1A1*, (C) *RUNX2*, and (D) *OPN* gene expression in male and female VICs cultured on hydrogels and treated with annexin A2, cystatin C, SB203580, or combinations. All gene expression is normalized to male vehicle control. For all graphs, data is shown as mean  $\pm$  standard deviation with statistical significance determined by one-way ANOVA with Tukey posttests. Statistical significance is indicated by \*\*\*\* =  $p < 0.0001$ , \* =  $p < 0.05$  for differences between groups; # =  $p < 0.05$  for differences relative to the male vehicle control; \$ =  $p < 0.05$  for differences relative to the female vehicle control.

**Supplemental Table 1: Primers used for RT-PCR**

| <b>Gene</b>   | <b>Forward Primer (5'-3')</b> | <b>Reverse Primer (5'-3')</b> |
|---------------|-------------------------------|-------------------------------|
| <i>RPL30</i>  | AGATTTCTCAAGGCTGGGC           | GCTGGGGTACAAGCAGACTC          |
| <i>ACTA2</i>  | GCAAACAGGAATACGATGAAGCC       | AACACATAGGTAACGAGTCAGAGC      |
| <i>COL1A1</i> | GGGCAAGACAGTGATTGAATACA       | GGATGGAGGGAGTTTACAGGAA        |
| <i>RUNX2</i>  | AACAACCACAGAACCACAAG          | TGACCTGCGGAGATTAACC           |
| <i>OPN</i>    | GCGTCTTCTGAGATCAACTG          | CACTATACATTCACCAACTAAGC       |



**Supplemental Table 2: Abbreviations for candidate proteins**

| <b>Protein Abbreviation</b> | <b>Full Protein Name</b>                             | <b>Protein Abbreviation</b> | <b>Full Protein Name</b>                             |
|-----------------------------|------------------------------------------------------|-----------------------------|------------------------------------------------------|
| <b>ANXA2</b>                | <b>Annexin A2</b>                                    | LYZ                         | Lysozyme C                                           |
| ARG1                        | Arginase-1                                           | MAPK12                      | Mitogen-activated protein kinase 12                  |
| ANF                         | Atrial natriuretic factor                            | NBL1                        | Neuroblastoma suppressor of tumorigenicity 1         |
| CA13                        | Carbonic anhydrase 13                                | NPPB                        | N-terminal pro-BNP                                   |
| CCL24                       | C-C motif chemokine 24                               | NTF3                        | Neurotrophin-3                                       |
| <b>CysC</b>                 | <b>Cystatin C</b>                                    | PES1                        | Pescadillo homolog                                   |
| DLL4                        | Delta-like protein 4                                 | S100A9                      | Protein S100-A9                                      |
| DKK3                        | Dickkopf-related protein 3                           | PDXK                        | Pyridoxal kinase                                     |
| DCTN2                       | Dynactin subunit 2                                   | CRYZL1                      | Quinone oxidoreductase-like protein 1                |
| EFNB3                       | Ephrin-B3                                            | RARRES2                     | Retinoic acid receptor responder protein 2           |
| FN1                         | Fibronectin Fragment 3                               | SECTM1                      | Secreted and transmembrane protein 1                 |
| GFRA3                       | GDNF family receptor alpha-3                         | SPHK1                       | Sphingosine kinase 1                                 |
| CXCL1                       | Growth-regulated alpha protein                       | TAGLN2                      | Transgelin-2                                         |
| EHMT2                       | Histone-lysine N-methyltransferase                   | TPM4                        | Tropomyosin alpha-4 chain                            |
| IFNL2                       | Interferon lambda-2                                  | TNFSF4                      | Tumor necrosis factor ligand superfamily member 4    |
| IL2RA                       | Interleukin-2 receptor subunit alpha                 | TNFRSF1B                    | Tumor necrosis factor receptor superfamily member 1B |
| IL20RA                      | Interleukin-20 receptor subunit alpha                | TNFRSF8                     | Tumor necrosis factor receptor superfamily member 8  |
| KRT18                       | Keratin, type I cytoskeletal 18                      | TNFRSF9                     | Tumor necrosis factor receptor superfamily member 9  |
| LRRN3                       | Leucine-rich repeat transmembrane neuronal protein 3 | BTK                         | Tyrosine-protein kinase BTK                          |
